# Supplementary material for: Focus on the Role of Klotho Protein in Neuro-Immune Interactions in HT-22 Cells Upon LPS Stimulation
Source: PubMed Central journal article supplement (PMC7290853; doi:10.3390/cells9051231), 2020-05-16
Supplement: cells-09-01231-s001.pdf [file cells-09-01231-s001.pdf]

### ***Antibodies and primers***

Antibodies: anti-klotho (1:1000, #PA5-21078; RRID: AB\_11153007), anti-p-NF- $\kappa$ B p50 (1:1000, #PA5-37658; RRID: AB\_2554266), anti- $\beta$ -actin (1:10 000, #PA1-16889; RRID: AB\_568434), anti-BrdU (1:200, #MA3-071; RRID: AB\_10986341), anti-O-GlcNAc (1:5000, #MA1-072; RRID: AB\_326364), anti-HMOX-1 (1:1000, #MA1-112; RRID: AB\_2536823), anti-HMOX-2 (1:1000, #PA5-19156; RRID: AB\_10985656), anti-CD62 (WB: 1:1000, IF: 1:100, #MA1-10259; RRID: AB\_11155439), anti-CD86 (WB: 1:1000, IF: 1:100, #MA1-10293; RRID: AB\_11153536), anti-p-p38 (1:1000, #PA5-37536, RRID: AB\_2554145), anti-TRAF2 (1:1000, #PA5-20193, RRID: AB\_11152352), anti-GADD34 (1:1000, #PA1139, RRID: AB\_2539894), anti-p-IRE1  $\alpha$  (1:1000, #PA1-16927, RRID: AB\_2262241), anti-p-PERK (1:1000, #PA5-40294, RRID: AB\_2576881), anti-ATF6 (1:1000, #PA5-68556, RRID: AB\_2688633), anti-ATF4 (1:1000, #PA5-36624, RRID: AB\_2553621), anti-p-ASK1 (1:1000, #PA5-36619, RRID: AB\_2553618), anti-CHOP (1:1000, #PA5-36796, RRID: AB\_2553739), anti-p-eIF2a (1:1000, #MA5-15133; RRID: AB\_10983400), anti-p16 (1:1000, #PA1-16639; RRID: AB\_568662), anti-p21 (1:1000, #701151; RRID: AB\_2532411), anti-p27 (1:1000, #PA5-13254; RRID: AB\_2078006), anti-p53 (1:1000, #700439; RRID: AB\_2532324) (Thermo Fisher Scientific), anti- $\gamma$ H2AX (1:500, #CS208203) (Merck Millipore), anti-active caspase 3 (1:2000, #NBP1-45435, RRID: AB\_10008902) (Novus Biologicals), anti-Bcl2 (1:500, #sc-7382; RRID: AB\_626736), anti-IGF-IR $\beta$  (1:500, #sc-9038; RRID: AB\_671793) (Santa Cruz). Secondary antibodies: HRP-conjugated were: anti-mouse (1:40 000, #A9044; RRID: AB\_258431), anti-rabbit (1:40 000, #A0545; RRID: AB\_10689821) (Sigma), anti-goat (1:5000, #sc-2768; RRID: AB\_656964) (Santa Cruz) and fluorochrome-labelled were anti-rabbit Texas Red (1:1000, #T-2767; RRID: AB\_2556776) and anti-mouse Cy3 (1:500, #A10521; RRID: AB\_2534030) (Thermo Scientific).

***Table 1. Telomere-related primers sequences used in this study.***

| Gene        | Primer sequence                              | Annealing temp. ( °C) |
|-------------|----------------------------------------------|-----------------------|
| <i>TRF1</i> | fwd: TTCCCGAAAGTGGTGGAGTTT                   | 62                    |
|             | rev: TGGCCTTTAGGCTCATACACA                   |                       |
| <i>TRF2</i> | fwd: CCTCCCAGAAACTCAAGCGG                    | 63                    |
|             | rev: TCTCGTCAACCACAATCTCCT                   |                       |
| <i>RAP1</i> | fwd: TTCTTTACCAAATTGTGGTGGCT                 | 62                    |
|             | rev: CTCCGACTTGTAGGCTGTGG                    |                       |
| <i>TPP1</i> | fwd: GGCAAATGCACTTACAACCCT                   | 61                    |
|             | rev: CTCCGAGAGTCTTTCCAGGT                    |                       |
| <i>TIN2</i> | fwd: AAGAGCATGACCGTCTCCT                     | 63                    |
|             | rev: GGGTGGTGTACTTAGTGTCTC                   |                       |
| <i>POT1</i> | fwd: TTGGTTTCAACAGCTCCCTATAC                 | 62                    |
|             | rev: GGAGGGCTTCATAGTTTCCACT                  |                       |
| <i>TELO</i> | fwd: CGGTTTGTITGGGTTTGGGTTTGGGTTTGGGTTTGGGTT | 72                    |
|             | rev: GGCTTGCTTACCCTTACCCTTACCCTTACCCTTACCCT  |                       |
| <i>ACTB</i> | fwd: GCAGGAGTACGATGAGTCCG                    | 68                    |
|             | rev: ACGCAGCTCAGTAACAGTCC                    |                       |

**Table 2. Autophagy-related primers sequences used in this study.**

| Gene         | Primer sequence              | Annealing temp. ( °C) |
|--------------|------------------------------|-----------------------|
| <i>mTOR</i>  | fwd: ACCGGCACACATTTGAAGAAG   | 52.4                  |
|              | rev: CACCACCAAGGATAAGGTAG    |                       |
| <i>ULK1</i>  | fwd: AGGATGGGGACTTGGTTGC     | 52.4                  |
|              | rev: CGATGTTTTCGTGCTTTAGTTCC |                       |
| <i>PI3K</i>  | fwd: CCTGGACATCAACGTGCAG     | 53.2                  |
|              | rev: TGTCTCTTGGTATAGCCCAGAAA |                       |
| <i>BECN1</i> | fwd: AGTTGAGAAAGGCGAGACAC    | 54.4                  |
|              | rev: CACCACCAAGGATAAGGTAG    |                       |
| <i>BECN2</i> | fwd: GTCGCTACCGTCGTGACTTC    | 55.9                  |
|              | rev: CAGACATGCACCTACCCAGC    |                       |
| <i>ATG16</i> | fwd: CAGAGCAGCTACTAAGCGACT   | 52.4                  |
|              | rev: AAAAGGGGAGATTCGGACAGA   |                       |
| <i>LC3</i>   | fwd: CGAGAGCAGCATCCTACCAA    | 55.3                  |
|              | rev: TTCTTCCGCGAATGTTCGAGT   |                       |
| <i>ATG13</i> | fwd: CAGAAGTCTGGTGGAGGACT    | 56.7                  |
|              | rev: AGCAGGCTGATAGGAAAGGCGA  |                       |
| <i>ATG5</i>  | fwd: AGCAACTCTGGATGGGATTG    | 51.8                  |
|              | rev: CACTGCAGAGGTGTTTCCAA    |                       |
| <i>ACTB</i>  | fwd: CATCGGCAATGAGCGGTTCC    | 68.1                  |
|              | rev: CCGTGTTGGCGTAGAGGTCC    |                       |
